# Supplementary material
Source: PubMed Central journal article supplement (PMC6795103)
Supplement: attr-54-08-13_s01.pdf [file attr-54-08-13_s01.pdf]

---

[Mental Activities]

**How much time today did you do these *mental activities*: (HH:MM)**

- Low difficulty (watching TV, movies, listening to music)    \_\_\_ HRS    \_\_\_ MIN
- Moderate (texting, online activities, video games)        \_\_\_ HRS    \_\_\_ MIN
- High (reading, homework, studying, test-taking)         \_\_\_ HRS    \_\_\_ MIN

[Physical Activities]

**Did you do the following *physical activities* today (only consider things you did for at least 10 minutes)**

- *Vigorous* (made you breathe much harder than normal; heavy lifting, fast biking, etc)  
Yes / No
  - [*if Yes*] For how long [HH:MM]
- *Moderate* (made you breathe somewhat harder than normal; carrying light loads, biking at a regular pace, etc, but not walking). Yes / No
  - [*if Yes*] For how long [HH:MM]
- *Walking* only for recreation, sport, or exercise. Yes / No
  - [*if Yes*] For how long [HH:MM]
- How much time did you spend *sitting* today (at home, school, or any time) [HH:MM]

---

**Supplemental Figure. Mobile application activity questions. Adapted from the International Physical Activity Questionnaire (<https://sites.google.com/site/theipaq/>). Abbreviations: HH, hours; MM, minutes; TV, television; HRS, hours; MIN, minutes.**

**Supplemental Table 1. Unadjusted Commercial Actigraph-Recorded Activity Metrics, Mean ± SD (Effect Size)**

| Activity Metric                                  | Group                                 |                         |                         |                                     |                             |
|--------------------------------------------------|---------------------------------------|-------------------------|-------------------------|-------------------------------------|-----------------------------|
|                                                  | Concussed, Days                       |                         |                         |                                     | Control, Weeks <sup>a</sup> |
|                                                  | 0–2 (n = 16)                          | 3–6 (n = 23)            | 7–10 (n = 23)           | 11–14 (n = 21)                      | 1–2 (n = 15)                |
| <b>Step-based physical activity</b>              |                                       |                         |                         |                                     |                             |
| <b>Min/d</b>                                     |                                       |                         |                         |                                     |                             |
| Sedentary <sup>b</sup>                           | 1055.4 ± 268.9 <sup>f</sup><br>(0.82) | 870.3 ± 205.8 (0.13)    | 841.8 ± 243.3<br>(0.00) | 883.1 ± 223.5<br>(0.18)             | 840.7 ± 240.5               |
| Lightly active                                   | 146.2 ± 68.6 <sup>f</sup><br>(-0.97)  | 212.1 ± 70.9<br>(-0.06) | 208.7 ± 71.1<br>(-0.11) | 179.3 ± 73.6<br>(-0.50)             | 216.5 ± 72.1                |
| Fairly active                                    | 9.0 ± 10.5 <sup>f</sup><br>(-0.91)    | 22.3 ± 22.9<br>(0.04)   | 25.5 ± 21.6<br>(0.20)   | 20.5 ± 17.8<br>(-0.06)              | 21.5 ± 15.9                 |
| Very active                                      | 16.3 ± 24.7<br>(-0.59)                | 26.7 ± 32.4<br>(-0.15)  | 32.3 ± 28.0<br>(0.04)   | 27.6 ± 29.4<br>(-0.13)              | 31.2 ± 24.6                 |
| Moderate to vigorous <sup>c</sup>                | 25.3 ± 33.2 <sup>f</sup><br>(-0.73)   | 49.1 ± 53.3<br>(-0.07)  | 57.9 ± 48.5<br>(0.11)   | 48.1 ± 44.7<br>(-0.11)              | 52.7 ± 39.6                 |
| <b>Count/d</b>                                   |                                       |                         |                         |                                     |                             |
| Step count                                       | 6464 ± 2620 <sup>g</sup><br>(-1.37)   | 9530 ± 2696<br>(-0.40)  | 9924 ± 2936<br>(-0.26)  | 8831 ± 2195 <sup>f</sup><br>(-0.68) | 10 748 ± 3442               |
| <b>Heart-rate–based physical activity, min/d</b> |                                       |                         |                         |                                     |                             |
| Out of range <sup>d</sup>                        | 602.4 ± 371.6 <sup>f</sup><br>(-0.97) | 977.3 ± 331.4 (0.06)    | 962.2 ± 311.5<br>(0.01) | 980.2 ± 256.0<br>(0.07)             | 957.8 ± 340.5               |
| Fat burn                                         | 44.7 ± 57.0<br>(0.02)                 | 74.1 ± 80.5<br>(0.45)   | 93.9 ± 119.3<br>(0.52)  | 83.6 ± 93.4<br>(0.52)               | 43.6 ± 33.1                 |
| Cardio                                           | 6.8 ± 23.4<br>(0.30)                  | 3.4 ± 9.0<br>(0.25)     | 4.3 ± 15.3<br>(0.22)    | 4.2 ± 8.6<br>(0.37)                 | 1.6 ± 2.2                   |
| Peak                                             | 0.0 ± 0.0<br>(-0.64)                  | 0.2 ± 0.4<br>(0.30)     | 0.4 ± 1.4<br>(0.26)     | 0.5 ± 1.5<br>(0.34)                 | 0.1 ± 0.2                   |
| Moderate to vigorous <sup>e</sup>                | 6.8 ± 23.4<br>(0.29)                  | 3.6 ± 9.3<br>(0.25)     | 4.7 ± 16.6<br>(0.23)    | 4.6 ± 9.7<br>(0.38)                 | 1.7 ± 2.2                   |

<sup>a</sup> Control-group activity was averaged across the entire 2-week assessment period.

<sup>b</sup> Duration was estimated by subtracting the time in the other 3 activity zones from the estimated wear time.

<sup>c</sup> Combination of the highest 2 physical activity zones for each metric: fairly active and very active.

<sup>d</sup> Time refers to time when heart rate was less than the fat burn range.

<sup>e</sup> Combination of the highest 2 physical activity zones: cardio and peak.

<sup>f</sup>  $P < .05$ .

<sup>g</sup>  $P < .01$ .

**Supplemental Table 2. Group Comparisons of Clinical Assessments, Mean ± SD**

| Clinical Assessment                                            | Group                       |                           | P Value            |
|----------------------------------------------------------------|-----------------------------|---------------------------|--------------------|
|                                                                | Concussed (n = 25)          | Control (n = 15)          |                    |
| <b>Sport Concussion Assessment Tool 3 symptom score</b>        |                             |                           |                    |
| Baseline                                                       | 2.88 ± 5.74                 | 1.29 ± 1.98               | .32                |
| Days 0–2                                                       | 16.79 ± 18.49 <sup>b</sup>  | 0.80 ± 1.61               | <.001 <sup>f</sup> |
| Day 8                                                          | 4.91 ± 16.40 <sup>c</sup>   | 0.43 ± 0.76               | .32                |
| Day 15                                                         | 0.91 ± 2.78 <sup>c</sup>    | 1.23 ± 4.15               | .79                |
| <b>Standardized Assessment of Concussion total score</b>       |                             |                           |                    |
| Baseline                                                       | 26.12 ± 2.24                | 25.14 ± 1.79              | .17                |
| Days 0–2                                                       | 26.20 ± 2.52                | 26.60 ± 2.06 <sup>d</sup> | .61                |
| Day 8                                                          | 26.91 ± 1.98                | 26.50 ± 1.99              | .54                |
| Day 15                                                         | 27.48 ± 1.81 <sup>c,d</sup> | 26.38 ± 2.29              | .12                |
| <b>Balance Error Scoring System total score</b>                |                             |                           |                    |
| Baseline                                                       | 11.72 ± 4.84                | 12.27 ± 3.54              | .71                |
| Days 0–2                                                       | 12.76 ± 4.68                | 9.21 ± 3.97 <sup>d</sup>  | .02 <sup>f</sup>   |
| Day 8                                                          | 11.91 ± 5.12                | 9.07 ± 4.20 <sup>d</sup>  | .09                |
| Day 15                                                         | 10.13 ± 4.62 <sup>c</sup>   | 8.23 ± 4.23 <sup>d</sup>  | .23                |
| <b>King-Devick Test</b>                                        |                             |                           |                    |
| Baseline <sup>a</sup>                                          | 48.77 ± 9.53                | 44.00 ± 7.26              | .23                |
| Days 0–2                                                       | 55.44 ± 14.24 <sup>b</sup>  | 44.99 ± 5.86              | .02 <sup>f</sup>   |
| Day 8                                                          | 48.15 ± 9.39 <sup>c</sup>   | 42.83 ± 6.24              | .16                |
| Day 15                                                         | 47.26 ± 9.12 <sup>c,e</sup> | 42.40 ± 5.76              | .16                |
| <b>Immediate Post-Concussion Assessment and Cognitive Test</b> |                             |                           |                    |
| <b>Visual memory</b>                                           |                             |                           |                    |
| Baseline                                                       | 71.71 ± 12.10               | 73.00 ± 20.10             | .80                |
| Days 0–2                                                       | 71.33 ± 13.79               | 76.53 ± 13.07             | .25                |
| Day 8                                                          | 73.76 ± 14.00               | 78.86 ± 13.00             | .29                |
| Day 15                                                         | 71.95 ± 13.03               | 76.08 ± 13.37             | .39                |
| <b>Verbal memory</b>                                           |                             |                           |                    |
| Baseline                                                       | 83.58 ± 11.36               | 81.47 ± 14.53             | .61                |

|                    |                           |                            |                   |
|--------------------|---------------------------|----------------------------|-------------------|
| Days 0–2           | 80.17 ± 10.95             | 87.73 ± 11.71              | .048 <sup>f</sup> |
| Day 8              | 82.14 ± 12.01             | 87.00 ± 11.01              | .24               |
| Day 15             | 84.91 ± 10.66             | 90.83 ± 10.91 <sup>d</sup> | .13               |
| Visual motor speed |                           |                            |                   |
| Baseline           | 36.32 ± 5.77              | 36.74 ± 6.70               | .84               |
| Days 0–2           | 38.10 ± 6.06              | 40.94 ± 6.30 <sup>d</sup>  | .17               |
| Day 8              | 38.95 ± 5.15              | 41.44 ± 5.69 <sup>d</sup>  | .19               |
| Day 15             | 38.76 ± 6.48 <sup>d</sup> | 42.32 ± 5.78 <sup>d</sup>  | .12               |
| Reaction time      |                           |                            |                   |
| Baseline           | 0.58 ± 0.06               | 0.59 ± 0.06                | .76               |
| Days 0–2           | 0.59 ± 0.13               | 0.58 ± 0.05                | .84               |
| Day 8              | 0.60 ± 0.06 <sup>b</sup>  | 0.57 ± 0.05                | .13               |
| Day 15             | 0.62 ± 0.09               | 0.55 ± 0.04                | .007 <sup>f</sup> |

<sup>a</sup> A subset of the sample (12 in the concussed group, 9 in the control group) was assessed at baseline with the King-

Devick Test, which limits the number of participants available for within-subjects comparisons to baseline performance.

<sup>b</sup> Worse than baseline.

<sup>c</sup> Improved relative to days 0–2.

<sup>d</sup> Improved relative to baseline.

<sup>e</sup> Improved relative to day 8.

<sup>f</sup> Group difference ( $P < .05$ ).
